# Supplementary material for: The BMI1 inhibitor PTC-209 is a potential compound to halt cellular growth in biliary tract cancer cells
Source: PubMed Central journal article supplement (PMC4808030; doi:10.18632/oncotarget.6378), 2015-11-24
Supplement: oncotarget-07-0745-s001.pdf [file oncotarget-07-0745-s001.pdf]

## The BMI1 inhibitor PTC-209 is a potential compound to halt cellular growth in biliary tract cancer cells

### Supplementary Material

| Cell line | PTC-209 ( $\mu\text{M}$ ) |       |      |      |      |      |      |      |      |      | IC <sub>10</sub><br>( $\mu\text{M}$ ) | IC <sub>50</sub><br>( $\mu\text{M}$ ) |      |
|-----------|---------------------------|-------|------|------|------|------|------|------|------|------|---------------------------------------|---------------------------------------|------|
|           | 20.0                      | 10.00 | 5.00 | 2.50 | 1.25 | 0.63 | 0.31 | 0.16 | 0.08 | 0.04 |                                       |                                       |      |
| BDC       |                           | *     | *    | *    | *    |      |      |      |      |      |                                       | 0.41                                  | 1.5  |
| CCSW-1    |                           | *     | *    |      | *    |      |      |      |      |      |                                       | 1.04                                  | n.q. |
| EGi-1     |                           |       |      |      |      |      |      |      |      |      |                                       | n.q.                                  | n.q. |
| GBC       | **                        | **    | **   | **   | **   | **   | *    | *    |      |      |                                       | 0.18                                  | 0.84 |
| MzChA-1   | *                         | **    | **   | **   | **   | **   | *    |      |      |      |                                       | 0.17                                  | 0.51 |
| MzChA-2   |                           | *     | **   | *    | *    | *    |      |      |      |      |                                       | 0.49                                  | 8.33 |
| SkChA-1   |                           | *     |      |      |      | *    |      |      |      |      |                                       | 0.25                                  | 1.44 |
| TFK-1     | **                        | **    | **   | **   | **   | **   | *    |      | *    |      |                                       | 0.24                                  | n.q. |

**File name:** Additional file 1

**Title of data:** Statistics for figure 2A

**Description of data:** Significant differences in cell viability between treated and untreated samples for the different cell lines and PTC-209 concentrations; 10% inhibitory concentration (IC<sub>10</sub>), 50% inhibitory concentration (IC<sub>50</sub>). Abbreviations: n.q.: not quantifiable

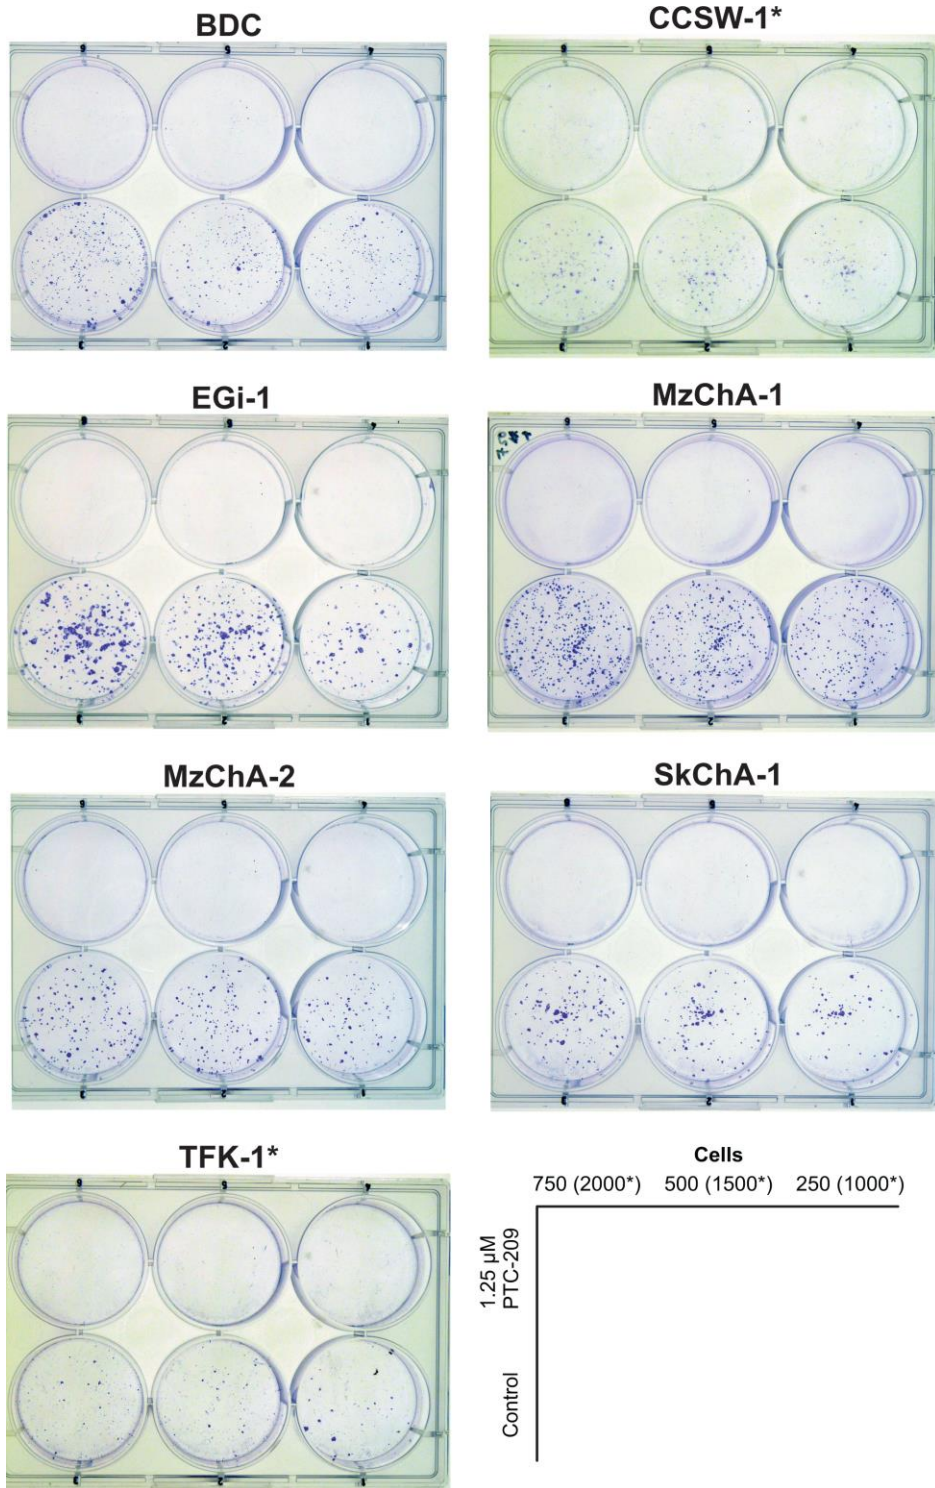

**File name:** Additional file 2

**Title of data:** Clonogenic assay for BTC cells

**Description of data:** BTC cell lines were treated with 1.25 μM PTC-209 or left untreated for 7 to 14 days, dependent on the cell line. Images of representative assays.

**File name:** Additional file 3

**Title of data:** PTC-209 halts cellular growth of biliary tract cancer cells

**Description of data:** Time course experiments were carried out on the JuLi BR live cell movie analyzer (NanoEnTek, Seoul, Korea). GBC cells were either treated with 1.25  $\mu\text{M}$  PTC-209 in sfDMEM or left untreated (sfDMEM only) and cell growth was monitored in parallel on two microscopy units in a humidified cell culture incubator (37°C, 5% CO<sub>2</sub>) by taking brightfield microscopy images every five minutes for 72 h (865 images per sample).

| Gene symbol | fold change | sem   | Refseq    | Description                                                         |
|-------------|-------------|-------|-----------|---------------------------------------------------------------------|
| ABL1        | -1.39       | 0.191 | NM_005157 | C-abl oncogene 1, non-receptor tyrosine kinase                      |
| ANAPC2      | -1.08       | 0.214 | NM_013366 | Anaphase promoting complex subunit 2                                |
| ATM         | -1.33       | 0.277 | NM_000051 | Ataxia telangiectasia mutated                                       |
| ATR         | -1.35       | 0.176 | NM_001184 | Ataxia telangiectasia and Rad3 related                              |
| AURKA       | 1.94        | 0.079 | NM_003600 | Aurora kinase A                                                     |
| AURKB       | -1.31       | 0.228 | NM_004217 | Aurora kinase B                                                     |
| BCIP1       | -1.46       | 0.352 | NM_016567 | BRCA2 and CDKN1A interacting protein                                |
| BCL2        | -3.39       | 0.582 | NM_000633 | B-cell CLL/lymphoma 2                                               |
| BIRC5       | 1.97        | 0.066 | NM_001168 | Baculoviral IAP repeat containing 5                                 |
| BRCA1       | -3.76       | 0.551 | NM_007294 | Breast cancer 1, early onset                                        |
| BRCA2       | -1.98       | 0.333 | NM_000059 | Breast cancer 2, early onset                                        |
| CASP3       | -1.41       | 0.136 | NM_004346 | Caspase 3, apoptosis-related cysteine peptidase                     |
| CCNA2       | 1.82        | 0.188 | NM_001237 | Cyclin A2                                                           |
| CCNB1       | 2.90        | 0.769 | NM_031966 | Cyclin B1                                                           |
| CCNB2       | 2.39        | 0.424 | NM_004701 | Cyclin B2                                                           |
| CCNC        | -1.40       | 0.107 | NM_005190 | Cyclin C                                                            |
| CCND1       | -1.74       | 0.227 | NM_053056 | Cyclin D1                                                           |
| CCND2       | 1.50        | 0.242 | NM_001759 | Cyclin D2                                                           |
| CCND3       | -2.32       | 0.048 | NM_001760 | Cyclin D3                                                           |
| CCNE1       | -17.00      | 1.996 | NM_001238 | Cyclin E1                                                           |
| CCNF        | 1.23        | 0.115 | NM_001761 | Cyclin F                                                            |
| CCNG1       | -2.86       | 0.563 | NM_004060 | Cyclin G1                                                           |
| CCNG2       | 1.80        | 0.423 | NM_004354 | Cyclin G2                                                           |
| CCNH        | 1.56        | 0.022 | NM_001239 | Cyclin H                                                            |
| CCNT1       | 1.71        | 0.184 | NM_001240 | Cyclin T1                                                           |
| CDC16       | -1.42       | 0.181 | NM_003903 | Cell division cycle 16 homolog (S. cerevisiae)                      |
| CDC20       | 2.73        | 0.702 | NM_001255 | Cell division cycle 20 homolog (S. cerevisiae)                      |
| CDC25A      | -5.72       | 1.369 | NM_001789 | Cell division cycle 25 homolog A (S. pombe)                         |
| CDC25C      | 1.88        | 0.154 | NM_001790 | Cell division cycle 25 homolog C (S. pombe)                         |
| CDC34       | 1.03        | 0.131 | NM_004359 | Cell division cycle 34 homolog (S. cerevisiae)                      |
| CDC6        | -2.01       | 0.278 | NM_001254 | Cell division cycle 6 homolog (S. cerevisiae)                       |
| CDK1        | 1.14        | 0.087 | NM_001786 | Cyclin-dependent kinase 1                                           |
| CDK2        | -2.65       | 0.322 | NM_001798 | Cyclin-dependent kinase 2                                           |
| CDK4        | -2.50       | 0.214 | NM_000075 | Cyclin-dependent kinase 4                                           |
| CDK5R1      | -2.15       | 0.301 | NM_003885 | Cyclin-dependent kinase 5, regulatory subunit 1 (p35)               |
| CDK5RAP1    | 1.35        | 0.145 | NM_016408 | CDK5 regulatory subunit associated protein 1                        |
| CDK6        | 1.20        | 0.184 | NM_001259 | Cyclin-dependent kinase 6                                           |
| CDK7        | 1.22        | 0.172 | NM_001799 | Cyclin-dependent kinase 7                                           |
| CDK8        | -1.97       | 0.190 | NM_001260 | Cyclin-dependent kinase 8                                           |
| CDKN1A      | 2.02        | 0.032 | NM_000389 | Cyclin-dependent kinase inhibitor 1A (p21, Cip1)                    |
| CDKN1B      | 1.71        | 0.338 | NM_004064 | Cyclin-dependent kinase inhibitor 1B (p27, Kip1)                    |
| CDKN2A      | n.q.        | n.q.  | NM_000077 | Cyclin-dependent kinase inhibitor 2A (melanoma, p16, inhibits CDK4) |
| CDKN2B      | 2.05        | 0.298 | NM_004936 | Cyclin-dependent kinase inhibitor 2B (p15, inhibits CDK4)           |
| CDKN3       | 1.60        | 0.189 | NM_005192 | Cyclin-dependent kinase inhibitor 3                                 |
| CHEK1       | -2.08       | 0.278 | NM_001274 | CHK1 checkpoint homolog (S. pombe)                                  |
| CHEK2       | -1.23       | 0.156 | NM_007194 | CHK2 checkpoint homolog (S. pombe)                                  |
| CKS1B       | 1.11        | 0.169 | NM_001826 | CDC28 protein kinase regulatory subunit 1B                          |
| CKS2        | 1.36        | 0.101 | NM_001827 | CDC28 protein kinase regulatory subunit 2                           |
| CUL1        | -1.42       | 0.280 | NM_003592 | Cullin 1                                                            |
| CUL2        | -1.57       | 0.219 | NM_003591 | Cullin 2                                                            |
| CUL3        | 1.12        | 0.132 | NM_003590 | Cullin 3                                                            |
| E2F1        | -5.16       | 0.700 | NM_005225 | E2F transcription factor 1                                          |
| E2F4        | -1.15       | 0.053 | NM_001950 | E2F transcription factor 4, p107/p130-binding                       |
| GADD45A     | 2.02        | 0.219 | NM_001924 | Growth arrest and DNA-damage-inducible, alpha                       |
| GTS1        | 2.96        | 0.232 | NM_016426 | G-2 and S-phase expressed 1                                         |
| HUS1        | -1.21       | 0.098 | NM_004507 | HUS1 checkpoint homolog (S. pombe)                                  |
| KNTC1       | -2.37       | 0.040 | NM_014708 | Kinetochore associated 1                                            |
| KPNA2       | 1.13        | 0.069 | NM_002266 | Karyopherin alpha 2 (RAG cohort 1, importin alpha 1)                |
| MAD2L1      | 1.17        | 0.097 | NM_002358 | MAD2 mitotic arrest deficient-like 1 (yeast)                        |
| MAD2L2      | -1.50       | 0.213 | NM_006341 | MAD2 mitotic arrest deficient-like 2 (yeast)                        |
| MCM2        | -8.55       | 0.633 | NM_004526 | Minichromosome maintenance complex component 2                      |
| MCM3        | -7.23       | 0.594 | NM_002388 | Minichromosome maintenance complex component 3                      |
| MCM4        | -2.95       | 0.459 | NM_005914 | Minichromosome maintenance complex component 4                      |
| MCM5        | -7.19       | 1.223 | NM_006739 | Minichromosome maintenance complex component 5                      |
| MDM2        | 1.19        | 0.132 | NM_002392 | Mdm2 p53 binding protein homolog (mouse)                            |
| MKI67       | 1.21        | 0.030 | NM_002417 | Antigen identified by monoclonal antibody Ki-67                     |
| MNAT1       | 1.17        | 0.099 | NM_002431 | Menage a trois homolog 1, cyclin H assembly factor (Xenopus laevis) |
| MRE11A      | -2.40       | 0.329 | NM_005590 | MRE11 meiotic recombination 11 homolog A (S. cerevisiae)            |
| NBN         | 1.14        | 0.126 | NM_002485 | Nibrin                                                              |
| RAD1        | -1.07       | 0.092 | NM_002853 | RAD1 homolog (S. pombe)                                             |
| RAD17       | 1.25        | 0.143 | NM_002873 | RAD17 homolog (S. pombe)                                            |
| RAD51       | -2.56       | 0.384 | NM_002875 | RAD51 homolog (S. cerevisiae)                                       |
| RAD9A       | -1.91       | 0.327 | NM_004584 | RAD9 homolog A (S. pombe)                                           |
| RB1         | 1.00        | 0.132 | NM_000321 | Retinoblastoma 1                                                    |
| RBBP8       | -1.04       | 0.027 | NM_002894 | Retinoblastoma binding protein 8                                    |
| RBL1        | -2.14       | 0.423 | NM_002895 | Retinoblastoma-like 1 (p107)                                        |
| RBL2        | -1.45       | 0.131 | NM_005611 | Retinoblastoma-like 2 (p130)                                        |
| SERTAD1     | 1.23        | 0.206 | NM_013376 | SERTA domain containing 1                                           |
| SKP2        | -3.70       | 0.446 | NM_005983 | S-phase kinase-associated protein 2 (p45)                           |
| STMN1       | 1.51        | 0.210 | NM_005563 | Stathmin 1                                                          |
| TFDP1       | -3.31       | 0.331 | NM_007111 | Transcription factor Dp-1                                           |
| TFDP2       | -4.28       | 0.612 | NM_006286 | Transcription factor Dp-2 (E2F dimerization partner 2)              |
| TP53        | 1.25        | 0.215 | NM_000546 | Tumor protein p53                                                   |
| WEE1        | 1.28        | 0.239 | NM_003390 | WEE1 homolog (S. pombe)                                             |

**File name:** Additional file 4

**File format:** pdf

**Title of data:** Supplementary data for figure 3C

**Description of data:** Complete list of all 84 cell cycle related genes investigated for changes in expression following PTC-209 treatment.

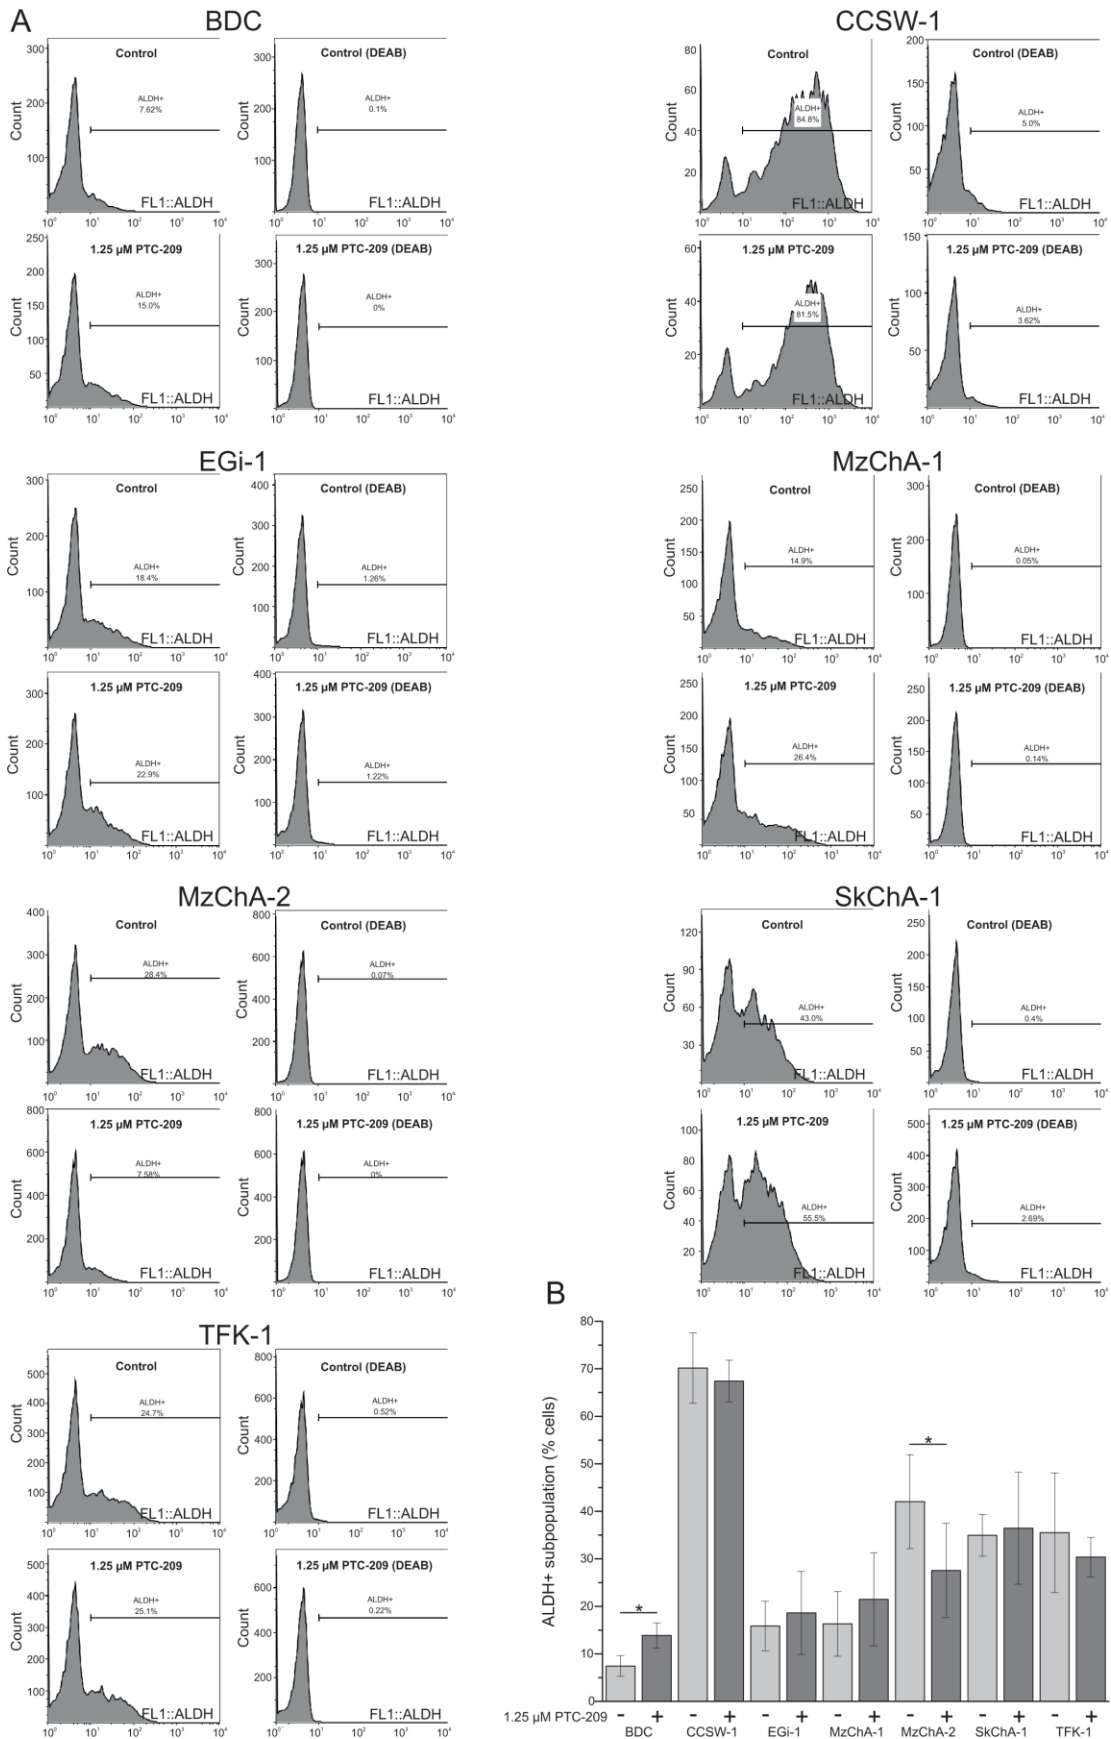

**File name:** Additional file 5

**Title of data:** Effect of PTC-209 on ALDH+ subpopulation in BTC cell lines

**Description of data:** Cells were treated with 1.25  $\mu$ M PTC-209 or left untreated (sfDMEM only) for 72 h. (A) Representative histograms for each cell line including negative DEAB control. (B) Quantification of effect of PTC-209 treatment on ALDH+ subpopulation in BTC cells. Abbreviations: ALDH+: aldehyde dehydrogenase-1 positive cells; BTC: biliary tract cancer; DEAB: N,N-diethylaminobenzaldehyde; h: hours
